# Supplementary material for: A randomized controlled trial of lusutrombopag in Japanese patients with chronic liver disease undergoing radiofrequency ablation
Source: Springer Nature journal article supplement (doi:10.1007/s00535-018-1499-2), 2018-08-13

## Supplement S3. Patient disposition

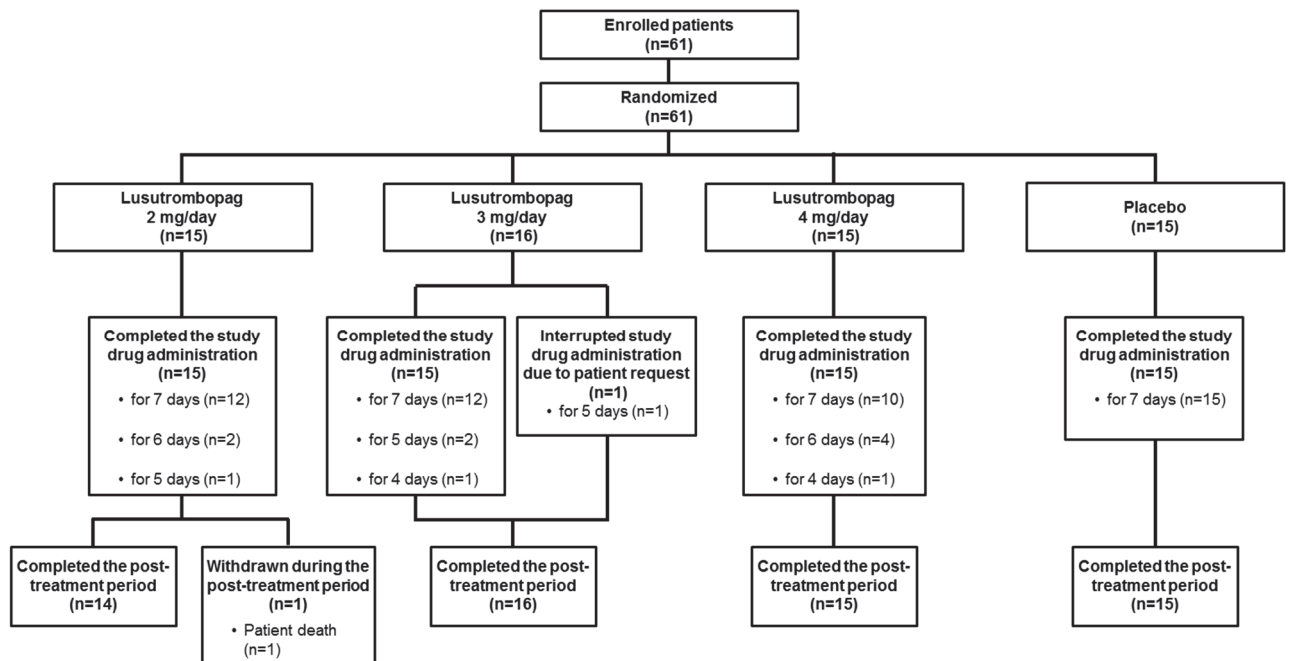

Supplement: MOESM3 [file 16030720]
