# Supplementary material for: A randomized controlled trial of lusutrombopag in Japanese patients with chronic liver disease undergoing radiofrequency ablation
Source: Springer Nature journal article supplement (doi:10.1007/s00535-018-1499-2), 2018-08-13
Supplement: MOESM4 [file 16030720]

## Supplement S4. Details of platelet transfusions

|                                                         | Lusutrombopag        |                      |                      | Placebo<br>n = 15    | Overall<br>N = 61 |
|---------------------------------------------------------|----------------------|----------------------|----------------------|----------------------|-------------------|
|                                                         | 2 mg<br>n = 15       | 3 mg<br>n = 16       | 4 mg<br>n = 15       |                      |                   |
| Patients with platelet transfusion                      | 3 (20.0)             | 3 (18.8)             | 4 (26.7)             | 12 (80.0)            | 22 (36.1)         |
| Reason for platelet transfusion:                        |                      |                      |                      |                      |                   |
| Platelet count $<50 \times 10^3/\mu\text{L}$ before RFA | 2 (13.3)             | 3 (18.8)             | 3 (20.0)             | 12 (80.0)            | 20 (32.8)         |
| Adverse events related to bleeding                      | 0                    | 1 (6.3)              | 0                    | 0                    | 1 (1.6)           |
| Other                                                   | 1 (6.7) <sup>a</sup> | 1 (6.3) <sup>b</sup> | 1 (6.7) <sup>c</sup> | 1 (6.7) <sup>d</sup> | 4 (6.6)           |
| Number of platelet transfusions per patient             |                      |                      |                      |                      |                   |
| 1                                                       | 2 (13.3)             | 2 (12.5)             | 4 (26.7)             | 8 (53.3)             | 16 (26.2)         |
| 2                                                       | 1 (6.7)              | 0                    | 0                    | 3 (20.0)             | 4 (6.6)           |
| 3                                                       | 0                    | 1 (6.3)              | 0                    | 1 (6.7)              | 2 (3.3)           |
| Mean dose (JP unit <sup>e</sup> ), mean $\pm$ SD        | 10.0 $\pm$ 0.0       | 17.8 $\pm$ 6.9       | 12.5 $\pm$ 5.0       | 11.7 $\pm$ 2.5       | 12.4 $\pm$ 4.1    |

Data are presented as n (%) unless otherwise stated.

<sup>a</sup>Received platelet transfusion to ensure safety, because platelet count decreased to  $45 \times 10^3/\mu\text{L}$  on the day of surgery.

<sup>b</sup>Received second platelet transfusion prior to permanent pacemaker indwelling (first platelet transfusion was performed because platelet count was  $<50 \times 10^3/\mu\text{L}$  before percutaneous liver ablation).

<sup>c</sup>Received platelet transfusion after percutaneous liver ablation because platelet count was  $<50 \times 10^3/\mu\text{L}$  on Day 21.

<sup>d</sup>Received second transfusion after percutaneous liver ablation (first platelet transfusion was performed because platelet count was  $<50 \times 10^3/\mu\text{L}$  before percutaneous liver ablation).

<sup>e</sup>1 JP unit contains  $\sim 2 \times 10^{10}$  platelets.

Abbreviations: RFA, radiofrequency ablation; SD standard deviation
