# Supplementary material for: A randomized controlled trial of lusutrombopag in Japanese patients with chronic liver disease undergoing radiofrequency ablation
Source: Springer Nature journal article supplement (doi:10.1007/s00535-018-1499-2), 2018-08-13
Supplement: MOESM5 [file 16030720]

## Supplement S5. Change in blood coagulation/fibrinolysis parameters

|                                           | Lusutrombopag  |                |                | Placebo<br>n = 15 |
|-------------------------------------------|----------------|----------------|----------------|-------------------|
|                                           | 2 mg<br>n = 15 | 3 mg<br>n = 16 | 4 mg<br>n = 15 |                   |
| PT INR                                    |                |                |                |                   |
| Baseline                                  | 1.31 ± 0.11    | 1.29 ± 0.13    | 1.23 ± 0.10    | 1.27 ± 0.10       |
| Day 8                                     | 1.30 ± 0.12    | 1.29 ± 0.13    | 1.28 ± 0.09    | 1.27 ± 0.09       |
| Day 17                                    | 1.35 ± 0.11    | 1.31 ± 0.14    | 1.36 ± 0.33    | 1.30 ± 0.10       |
| Day 35                                    | 1.30 ± 0.09    | 1.25 ± 0.13    | 1.33 ± 0.18    | 1.28 ± 0.09       |
| Activated partial thromboplastin time (s) |                |                |                |                   |
| Baseline                                  | 34.61 ± 3.75   | 33.38 ± 4.21   | 34.52 ± 4.45   | 34.16 ± 3.78      |
| Day 8                                     | 34.59 ± 4.54   | 33.58 ± 3.12   | 36.51 ± 3.91   | 34.26 ± 4.06      |
| Day 17                                    | 36.07 ± 4.45   | 34.80 ± 5.96   | 36.55 ± 6.57   | 33.17 ± 3.55      |
| Day 35                                    | 34.39 ± 4.66   | 32.71 ± 4.64   | 34.69 ± 4.48   | 34.28 ± 4.14      |
| Fibrinogen (mg/dL)                        |                |                |                |                   |
| Baseline                                  | 165.5 ± 38.0   | 187.8 ± 71.1   | 163.4 ± 37.2   | 185.8 ± 45.4      |
| Day 8                                     | 175.9 ± 45.5   | 172.5 ± 39.2   | 165.6 ± 46.2   | 184.9 ± 44.3      |
| Day 17                                    | 235.5 ± 91.0   | 233.6 ± 90.0   | 218.9 ± 81.4   | 207.8 ± 76.2      |
| Day 35                                    | 189.4 ± 57.6   | 188.0 ± 61.1   | 172.7 ± 45.9   | 179.7 ± 37.4      |
| Fibrinogen degradation product (µg/mL)    |                |                |                |                   |
| Baseline                                  | 3.1 ± 1.9      | 2.9 ± 1.6      | 2.8 ± 1.5      | 3.7 ± 3.4         |
| Day 8                                     | 3.3 ± 1.4      | 2.3 ± 0.8      | 3.2 ± 2.1      | 3.1 ± 2.5         |
| Day 17                                    | 7.5 ± 6.7      | 6.3 ± 2.5      | 4.4 ± 2.7      | 14.3 ± 20.4       |
| Day 35                                    | 5.6 ± 5.6      | 3.5 ± 1.6      | 3.3 ± 1.8      | 4.1 ± 2.8         |
| Antithrombin III (%)                      |                |                |                |                   |
| Baseline                                  | 59.8 ± 15.6    | 62.2 ± 21.5    | 56.1 ± 14.2    | 60.5 ± 22.7       |
| Day 8                                     | 60.9 ± 13.2    | 59.5 ± 21.3    | 49.8 ± 14.3    | 57.8 ± 20.8       |
| Day 17                                    | 55.8 ± 11.2    | 60.2 ± 23.2    | 55.4 ± 16.5    | 57.1 ± 20.0       |
| Day 35                                    | 61.1 ± 13.9    | 62.5 ± 20.3    | 56.1 ± 14.7    | 56.7 ± 20.0       |
| D-dimer (µg/mL)                           |                |                |                |                   |
| Baseline                                  | 0.865 ± 0.832  | 0.751 ± 0.698  | 0.577 ± 0.603  | 1.083 ± 1.327     |
| Day 8                                     | 0.915 ± 0.675  | 0.505 ± 0.444  | 0.778 ± 0.847  | 1.068 ± 1.327     |
| Day 17                                    | 2.143 ± 1.707  | 1.862 ± 0.921  | 1.551 ± 1.140  | 5.196 ± 7.884     |
| Day 35                                    | 1.429 ± 1.067  | 0.963 ± 0.726  | 0.812 ± 0.709  | 1.275 ± 1.286     |

Data are presented as mean ± SD.

Abbreviation: PT INR, international normalized ratio of prothrombin time
