# Supplementary material for: A randomized controlled trial of lusutrombopag in Japanese patients with chronic liver disease undergoing radiofrequency ablation
Source: Springer Nature journal article supplement (doi:10.1007/s00535-018-1499-2), 2018-08-13
Supplement: MOESM6 [file 16030720]

## Supplement S6. Summary of thrombus-related adverse events

| Sex/Age | Group    | Platelet transfusion | Baseline platelet count ( $\times 10^3/\mu\text{L}$ ) | Maximum platelet count (study day) / platelet count immediately before the onset (study day) ( $\times 10^3/\mu\text{L}$ ) | Type of procedure (study day)              | Name of event                       | Relationship     | Duration of event <sup>a</sup> | Outcome                    |
|---------|----------|----------------------|-------------------------------------------------------|----------------------------------------------------------------------------------------------------------------------------|--------------------------------------------|-------------------------------------|------------------|--------------------------------|----------------------------|
| M/70    | Placebo  | Yes                  | 47                                                    | 62 (Day 17) / 62 (Day 17)                                                                                                  | RFA (Day 9, 16, 23)                        | Superior mesenteric vein thrombosis | Not related      | Day 19–121                     | Recovered                  |
| M/63    | 2 mg/day | Yes                  | 43                                                    | 57 (Day 27) / 37 (Day 17)                                                                                                  | RFA (Day 13)                               | PVT                                 | Not related      | Day 18–34                      | Not recovered <sup>d</sup> |
| F/81    | 4 mg/day | No                   | 43                                                    | 105 (Day 19) / 91 (Day 14)                                                                                                 | TACE <sup>b</sup> (Day 8)<br>RFA (Day 11)  | Superior mesenteric vein thrombosis | Possibly related | Day 14–42                      | Recovered <sup>e</sup>     |
| F/77    | 4 mg/day | No                   | 47                                                    | 127 (Day 11, 13) / 85 (Day 18)                                                                                             | RFA (Day 13)<br>PEIT <sup>c</sup> (Day 13) | PVT                                 | Possibly related | Day 18–49                      | Not recovered <sup>f</sup> |

<sup>a</sup>The day of the initial dose of study drug is Day 1.

<sup>b, c</sup>Procedures performed in combination with RFA (primary invasive procedure).

<sup>d</sup>Patient was treated with danaparoid sodium for PVT, but did not recover from PVT at end of the post-treatment period. However, as general status was resolved, study follow-up was switched to usual care. The portal vein flow had been detected at onset.

<sup>e</sup>Patient treated with heparin and warfarin in therapy for PVT.

<sup>f</sup>Patient did not recover from PVT at end of the post-treatment period. However, as the flow of portal vein was stable without symptoms, study follow-up was switched to usual care. Abbreviations: RFA, radiofrequency ablation; PEIT, percutaneous ethanol injection therapy; PVT, portal vein thrombosis; TACE, transcatheter arterial chemoembolization
